# Supplementary material for: Development and validation of a prediction model for early identification of critically ill elderly COVID-19 patients
Source: publisher site journal article supplement (doi:10.18632/aging.103716), 2020-10-06
Supplement: Supplementary file [file aging-v12i19-103716-supplementary-material-SD1.pdf]

## SUPPLEMENTARY FIGURE

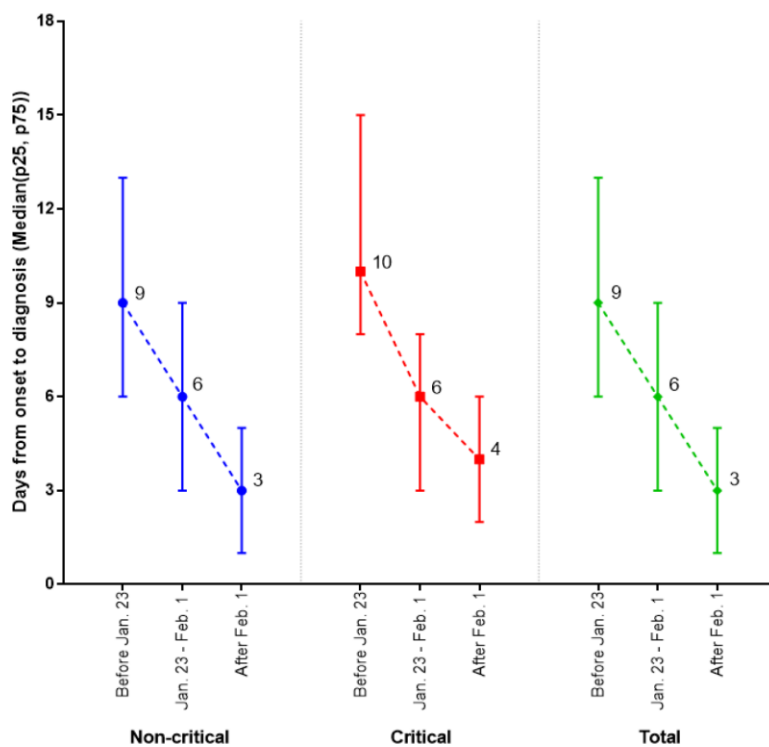

Supplementary Figure 1. Days from onset to diagnosis during different periods in critical and non-critical cases (n=2106).
