# Supplementary material for: Development and validation of a prediction model for early identification of critically ill elderly COVID-19 patients
Source: publisher site journal article supplement (doi:10.18632/aging.103716), 2020-10-06
Supplement: Supplementary file [file aging-v12i19-103716-supplementary-material-SD2.pdf]

## SUPPLEMENTARY TABLE

**Supplementary Table 1. Sensitive analysis of the risk factors for critical illness among COVID-19 patients in the development cohort.**

|                                       | <b>cOR (95% CI)</b> | <b>p</b> | <b>aOR (95% CI)</b> | <b>p</b> |
|---------------------------------------|---------------------|----------|---------------------|----------|
| Age                                   | 1.08 (1.06-1.11)    | <0.001   | 1.09 (1.06-1.12)    | <0.001   |
| Chronic obstructive pulmonary disease |                     |          |                     |          |
| No                                    | 1.00                |          | 1.00                |          |
| Yes                                   | 3.31 (1.77-6.20)    | <0.001   | 2.20 (1.08-4.45)    | 0.029    |
| Temperature (°C)                      |                     |          |                     |          |
| <37.3                                 | 1.00                |          | 1.00                |          |
| 37.3-38                               | 1.08 (0.62-1.86)    | 0.785    | 1.28 (0.74-2.29)    | 0.407    |
| 38.1-39                               | 1.88 (1.10-3.21)    | 0.020    | 2.11 (1.19-3.75)    | 0.011    |
| >39                                   | 5.05 (2.08-12.23)   | <0.001   | 5.05 (1.90-13.61)   | 0.001    |
| Fatigue                               |                     |          |                     |          |
| No                                    | 1.00                |          | 1.00                |          |
| Yes                                   | 1.98 (1.33-2.96)    | 0.001    | 1.69 (1.10-2.62)    | 0.018    |
| Shortness of breath                   |                     |          |                     |          |
| No                                    | 1.00                |          | 1.00                |          |
| Yes                                   | 4.31 (2.33-8.00)    | <0.001   | 2.83 (1.41-5.71)    | 0.004    |
| Lymphocyte percentage (%)             |                     |          |                     |          |
| 20-40                                 | 1.00                |          | 1.00                |          |
| <20                                   | 2.79 (1.85-4.21)    | <0.001   | 2.29 (1.47-3.55)    | <0.001   |
| >40                                   | 1.21 (0.49-2.97)    | 0.684    | 1.67 (0.65-4.28)    | 0.288    |

cOR, crude odds ratio; aOR, adjusted odds ratio.

In the multivariable model, the significant variables were selected using a backward procedure from age (as a continuous variable), sex, region, history of disease (hypertension, diabetes, coronary heart disease, chronic obstructive pulmonary disease, chronic kidney disease, or chronic liver disease), body temperature (<37.3°C, 37.3-38°C, 38.1-39°C, or >39°C), days from onset to diagnosis, white blood cell count, lymphocyte percentage, lymphocyte count, neutrophil percentage, symptoms (cough, fatigue, expectoration, chest distress, myalgia, shiver, headache, shortness of breath, dyspnea, diarrhea, runny nose, nausea, joint pain, vomit, stuffy nose, chest pain, dizziness, abdominal pain, or sore throat).
